# Supplementary material for: DSMRI: Domain Shift Analyzer for Multi-Center MRI Datasets
Source: MDPI journal article supplement (doi:10.3390/diagnostics13182947), 2023-09-14
Supplement: s1 [file s1]

# DSMRI: Domain Shift analyzer for multi-center MRI datasets

## Supplementary materials

Rafsanjany Kushol <sup>1,\*</sup>, Alan H. Wilman <sup>2</sup>, Sanjay Kalra <sup>1,3</sup> and Yee-Hong Yang <sup>1</sup>

<sup>1</sup> Department of Computing Science, University of Alberta, Edmonton, AB, T6G 2R3, Canada;

<sup>2</sup> Departments of Radiology and Diagnostic Imaging and Biomedical Engineering, University of Alberta, Edmonton, AB, T6G 2R3, Canada;

<sup>3</sup> Division of Neurology, Department of Medicine, University of Alberta, Edmonton, AB, T6G 2R3, Canada

\* Correspondence: kushol@ualberta.ca

**Table S1.** Scanning protocol details of the ADNI1, ADNI2, AIBL, PPMI, ABIDE, CALSNIC1, and CALSNIC2 datasets.

| Dataset  | Scanning Protocol | MRI Scanner Manufacturer                                                                    |                                                             |                                                       |
|----------|-------------------|---------------------------------------------------------------------------------------------|-------------------------------------------------------------|-------------------------------------------------------|
|          |                   | GE                                                                                          | Siemens                                                     | Philips                                               |
| ADNI1    | Model             | Genesis Signa, Signa Excite, Signa HDx                                                      | Symphony, Sonata, TrioTim, Trio, Avanto, Allegra            | Intera Achieva, Intera, Achieva, Gyroscan Intera      |
|          | Field Strength    | 1.5 T / 3.0 T                                                                               | 1.5 T / 3.0 T                                               | 1.5 T / 3.0 T                                         |
|          | Flip Angle        | 8°                                                                                          | 8° / 9°                                                     | 8°                                                    |
| ADNI2    | Resolution        | 1.0 × 1.0 × 1.2 / 0.94 × 0.94 × 1.2                                                         | 1.0 × 1.0 × 1.2 / 1.25 × 1.25 × 1.2                         | 1.0 × 1.0 × 1.2 / 0.94 × 0.94 × 1.2                   |
|          | Model             | Signa HDxt, Signa HDx, Signa Excite, Discovery MR750                                        | Symphony, Skyra, Verio, Avanto, TrioTim                     | Achieva dStream, Intera, Achieva, Ingenia, Ingenuity  |
|          | Field Strength    | 3.0 T                                                                                       | 3.0 T                                                       | 3.0 T                                                 |
| AIBL     | Flip Angle        | 11°                                                                                         | 9°                                                          | 9°                                                    |
|          | Resolution        | 1.05 × 1.05 × 1.2                                                                           | 1.05 × 1.05 × 1.2                                           | 1.05 × 1.05 × 1.2                                     |
|          | Model             | -                                                                                           | Avanto, TrioTim, Verio                                      | -                                                     |
| PPMI     | Field Strength    | -                                                                                           | 1.5 T / 3.0 T                                               | -                                                     |
|          | Flip Angle        | -                                                                                           | 9°                                                          | -                                                     |
|          | Resolution        | -                                                                                           | 1.0 × 1.0 × 1.2                                             | -                                                     |
| ABIDE    | Model             | Signa HDxt, Genesis Signa, Signa Architect, Signa Excite, Discovery MR750, Discovery MR750w | Symphony, Skyra, TrioTim, Prisma, Verio, Espree, Prisma Fit | Achieva dStream, Achieva, Intera, Gyroscan NT         |
|          | Field Strength    | 1.5 T / 3.0 T                                                                               | 1.5 T / 3.0 T                                               | 1.5 T / 3.0 T                                         |
|          | Flip Angle        | 8° / 11° / 13° / 15°                                                                        | 8° / 9° / 15°                                               | 8° / 9°                                               |
| CALSNIC1 | Resolution        | 1.0 × 1.0 × 1.0 / 0.94 × 0.94 × 1.2 / 0.94 × 0.94 × 0.7                                     | 1.0 × 1.0 × 1.0 / 1.25 × 1.25 × 1.3 / 0.49 × 0.49 × 2.0     | 1.0 × 1.0 × 1.0 / 0.94 × 0.94 × 1.2 / 1.0 × 1.0 × 1.2 |
|          | Model             | Signa Discovery MR750                                                                       | Allegra, Verio, TrioTim, Prisma,                            | Achieva, Intera                                       |
|          | Field Strength    | 3.0 T                                                                                       | 3.0 T                                                       | 3.0 T                                                 |
| CALSNIC2 | Flip Angle        | 8° / 15°                                                                                    | 7° / 8° / 9° / 10°                                          | 7° / 8°                                               |
|          | Resolution        | 1.0 × 1.0 × 1.0 / 0.86 × 0.86 × 1.5 / 1.02 × 1.02 × 1.2                                     | 1.0 × 1.0 × 1.0 / 1.0 × 1.0 × 1.33 / 0.5 × 0.5 × 1.2        | 1.0 × 1.0 × 1.0 / 0.98 × 0.98 × 1.2 /                 |
|          | Model             | Discovery MR750                                                                             | Prisma, TrioTim                                             | Intera                                                |
| CALSNIC2 | Field Strength    | 3.0 T                                                                                       | 3.0 T                                                       | 3.0 T                                                 |
|          | Flip Angle        | 11°                                                                                         | 8°                                                          | 9°                                                    |
|          | Resolution        | 1.0 × 1.0 × 1.0                                                                             | 1.0 × 1.0 × 1.0                                             | 1.0 × 1.0 × 1.0                                       |
| CALSNIC2 | Model             | Discovery MR750                                                                             | Prisma, TrioTim                                             | Achieva                                               |
|          | Field Strength    | 3.0 T                                                                                       | 3.0 T                                                       | 3.0 T                                                 |
|          | Flip Angle        | 16°                                                                                         | 10°                                                         | 10°                                                   |
|          | Resolution        | 1.0 × 1.0 × 1.0                                                                             | 1.0 × 1.0 × 1.0                                             | 1.0 × 1.0 × 1.0                                       |
